# Supplementary material for: Nano-evolution and protein-based enzymatic evolution predicts novel types of natural product nanozymes of traditional Chinese medicine: cases of herbzymes of Taishan-Huangjing (Rhizoma polygonati) and Goji (Lycium chinense)
Source: Royal Society of Chemistry journal article supplement (doi:10.1039/d1na00475a), 2021-01-01
Supplement: d1na00475a1.pdf [file d1na00475a1.pdf]

## Additional Reference

- [1] M. Liang and X. Yan, "Nanozymes: From New Concepts, Mechanisms, and Standards to Applications," *Acc. Chem. Res.*, 2019, doi: 10.1021/acs.accounts.9b00140.
- [2] X. Niu, N. Cheng, X. Ruan, D. Du, and Y. Lin, "Review—Nanozyme-Based Immunosensors and Immunoassays: Recent Developments and Future Trends," *J. Electrochem. Soc.*, vol. 167, no. 3, p. 037508, 2020, doi: 10.1149/2.0082003jes.
- [3] K. FAN, Y. HOU, R. ZHANG, and X. YAN, "Nanozymes: a new choice for disease treatment," *Sci. Sin. Vitae*, vol. 50, no. 3, pp. 311–328, 2020, doi: 10.1360/ssv-2019-0216.
- [4] B. Jiang, L. Fang, K. Wu, X. Yan, and K. Fan, "Ferritins as natural and artificial nanozymes for theranostics," *Theranostics*, vol. 10, no. 2, pp. 687–706, 2020, doi: 10.7150/thno.39827.
- [5] Z. Tao, B. Dong, Z. Teng, and Y. Zhao, "The Classification of Enzymes by Deep Learning," *IEEE Access*, vol. 8, pp. 89802–89811, 2020, doi: 10.1109/ACCESS.2020.2992468.
- [6] C. Wu *et al.*, "The class III peroxidase (POD) gene family in cassava: Identification, phylogeny, duplication, and expression," *Int. J. Mol. Sci.*, vol. 20, no. 11, pp. 1–17, 2019, doi: 10.3390/ijms20112730.
- [7] Y. Lin *et al.*, "Identification of anthocyanins-related glutathione s-transferase (Gst) genes in the genome of cultivated strawberry (*fragaria × ananassa*)," *Int. J. Mol. Sci.*, vol. 21, no. 22, pp. 1–19, 2020, doi: 10.3390/ijms21228708.
- [8] R. Tian, I. Seim, W. Ren, S. Xu, and G. Yang, "Contraction of the ROS scavenging enzyme glutathione s-transferase gene family in cetaceans," *G3 Genes, Genomes, Genet.*, vol. 9, no. 7, pp. 2303–2315, 2019, doi: 10.1534/g3.119.400224.
- [9] G. Song *et al.*, "Inhibition of hexokinases holds potential as treatment strategy for rheumatoid arthritis," *Arthritis Res. Ther.*, vol. 21, no. 1, pp. 1–11, 2019, doi: 10.1186/s13075-019-1865-3.
- [10] D. M. Zaher *et al.*, "Recent advances with alkaline phosphatase isoenzymes and their inhibitors," *Archiv der Pharmazie*. 2020, doi: 10.1002/ardp.202000011.
- [11] E. Lorentzen, B. Siebers, R. Hensel, and E. Pohl, "Structure, function and evolution of the Archaeal class I fructose-1,6-bisphosphate aldolase," 2004, doi: 10.1042/BST0320259.

- [12] W. Yizhe *et al.*, “Prognostic predictive effect of fructose-diphosphate aldolase A on lung cancer based on TCGA database analysis WANG,” vol. 49, no. 7, pp. 586–592, 2020.
- [13] G. J. Thomson, G. J. Howlett, A. E. Ashcroft, and A. Berry, “The dhna gene of *Escherichia coli* encodes a Class I fructose biphosphate aldolase,” *Biochem. J.*, 1998, doi: 10.1042/bj3310437.
- [14] S. J. Cooper *et al.*, “The crystal structure of a class II fructose-1,6-bisphosphate aldolase shows a novel binuclear metal-binding active site embedded in a familiar fold,” *Structure*, 1996, doi: 10.1016/S0969-2126(96)00138-4.
- [15] B. Siebers *et al.*, “Archaeal Fructose-1,6-bisphosphate Aldolases Constitute a New Family of Archaeal Type Class I Aldolase,” *J. Biol. Chem.*, 2001, doi: 10.1074/jbc.M103447200.
- [16] J. Sygusch, D. Beaudry, and M. Allaire, “Molecular architecture of rabbit skeletal muscle aldolase at 2.7-Å resolution,” *Proc. Natl. Acad. Sci. U. S. A.*, 1987, doi: 10.1073/pnas.84.22.7846.
- [17] N. Nagano, C. A. Orengo, and J. M. Thornton, “One fold with many functions: The evolutionary relationships between TIM barrel families based on their sequences, structures and functions,” *Journal of Molecular Biology*. 2002, doi: 10.1016/S0022-2836(02)00649-6.
- [18] E. Lorentzen *et al.*, “Crystal Structure of an Archaeal Class I Aldolase and the Evolution of ( $\beta\alpha$ )<sub>8</sub> Barrel Proteins,” *J. Biol. Chem.*, 2003, doi: 10.1074/jbc.M305922200.
- [19] A. Sallmyr, I. Rashid, S. K. Bhandari, T. Naila, and A. E. Tomkinson, “Human DNA ligases in replication and repair,” *DNA Repair (Amst)*., vol. 93, p. 102908, 2020, doi: 10.1016/j.dnarep.2020.102908.
- [20] W. Goedecke, “Ligases,” *xPharm Compr. Pharmacol. Ref.*, pp. 1–2, 2007, doi: 10.1016/B978-008055232-3.60610-5.
- [21] K. Chen and F. H. Arnold, “Tuning the activity of an enzyme for unusual environments: Sequential random mutagenesis of subtilisin E for catalysis in dimethylformamide,” *Proc. Natl. Acad. Sci. U. S. A.*, 1993, doi: 10.1073/pnas.90.12.5618.
- [22] T. N. Prize, “The Nobel Prize in Chemistry 2018: the directed evolution of enzymes and the phage display technologies,” vol. 36, no. 1, 2019.
- [23] F. H. Arnold, “Directed Evolution of Enzymes and Binding Proteins; Scientific Background on the Nobel Prize for Chemistry 2018,” *R. Swedish Acad. Sci.*, vol. 50005, no. 24, pp. 1–10, 2018, [Online]. Available: <https://www.nobelprize.org/uploads/2018/10/advanced-chemistryprize-2018.pdf>.

- [24] F. H. Arnold, "Innovation by Evolution: Bringing New Chemistry to Life (Nobel Lecture)," *Angew. Chemie - Int. Ed.*, vol. 58, no. 41, pp. 14420–14426, 2019, doi: 10.1002/anie.201907729.
- [25] G. Qu, T. Zhu, Y. Jiang, B. Wu, and Z. Sun, "Protein engineering: from directed evolution to computational design," *Sheng Wu Gong Cheng Xue Bao*, vol. 35, no. 10, pp. 1843–1856, 2019, doi: 10.13345/j.cjb.190221.
- [26] W. J. AYU Yang1, "Frontiers and challenges of artificial enzyme and directed evolution," vol. 38, no. 8, pp. 101–105, 2020, doi: 10.3981/j.issn.1000-7857.2020.08.012.
- [27] L. Gao *et al.*, "Intrinsic peroxidase-like activity of ferromagnetic nanoparticles," *Nat. Nanotechnol.*, vol. 2, no. 9, pp. 577–583, 2007, doi: 10.1038/nnano.2007.260.
- [28] S. Liu, F. Lu, R. Xing, and J. J. Zhu, "Structural effects of fe<sub>3</sub>O<sub>4</sub> nanocrystals on peroxidase-like activity," *Chem. - A Eur. J.*, 2011, doi: 10.1002/chem.201001789.
- [29] X. Q. Zhang, S. W. Gong, Y. Zhang, T. Yang, C. Y. Wang, and N. Gu, "Prussian blue modified iron oxide magnetic nanoparticles and their high peroxidase-like activity," *J. Mater. Chem.*, 2010, doi: 10.1039/c0jm00174k.
- [30] Z. Li, K. Feng, W. Zhang, M. Ma, N. Gu, and Y. Zhang, "Catalytic mechanism and application of nanozymes," *Kexue Tongbao/Chinese Sci. Bull.*, vol. 63, no. 21, pp. 2128–2139, 2018, doi: 10.1360/N972018-00426.
- [31] F. L. chun Xudong, "The Improvement of Enzyme Properties and Its Catalytic Engineering Strategy."
- [32] F. K. MA Long, "The finding and application of the novel properties of nanozyme and ferritin," *Chinese J. Nat.*, pp. 1–12, 2020, doi: 10.3969/j.issn.0253-9608.2020.01.001.
- [33] T. Zhang, F. Tian, L. Long, J. Liu, and X. Wu, "Diagnosis of rubella virus using antigen-conjugated au@pt nanorods as nanozyme probe," *Int. J. Nanomedicine*, 2018, doi: 10.2147/IJN.S171429.
- [34] X. Ding, D. Li, and J. Jiang, "Gold-based inorganic nanohybrids for nanomedicine applications," *Theranostics*, vol. 10, no. 18, pp. 8061–8079, 2020, doi: 10.7150/thno.42284.
- [35] R. Das, A. Dhiman, A. Kapil, V. Bansal, and T. K. Sharma, "Aptamer-mediated colorimetric and electrochemical detection of *Pseudomonas aeruginosa* utilizing peroxidase-mimic activity of gold NanoZyme," *Anal. Bioanal. Chem.*, 2019, doi: 10.1007/s00216-018-1555-z.

- [36] F. Dashtestani, H. Ghourchian, and A. Najafi, "Silver-gold-apoferritin nanozyme for suppressing oxidative stress during cryopreservation," *Mater. Sci. Eng. C*, 2019, doi: 10.1016/j.msec.2018.10.008.
- [37] J. Zhao *et al.*, "Nanozyme-mediated catalytic nanotherapy for inflammatory bowel disease," *Theranostics*, vol. 9, no. 10, pp. 2843–2855, 2019, doi: 10.7150/thno.33727.
- [38] S. Zhang, F. Lin, Q. Yuan, J. Liu, Y. Li, and H. Liang, "Robust magnetic laccase-mimicking nanozyme for oxidizing o-phenylenediamine and removing phenolic pollutants," *J. Environ. Sci. (China)*, 2020, doi: 10.1016/j.jes.2019.07.008.
- [39] K. Wang, C. Wu, F. Wang, M. Liao, and G. Jiang, "Bimetallic nanoparticles decorated hollow nanoporous carbon framework as nanozyme biosensor for highly sensitive electrochemical sensing of uric acid," *Biosens. Bioelectron.*, 2020, doi: 10.1016/j.bios.2019.111869.
- [40] W. Kong, X. Guo, M. Jing, F. Qu, and L. Lu, "Highly sensitive photoelectrochemical detection of bleomycin based on Au/WS<sub>2</sub> nanorod array as signal matrix and Ag/ZnMOF nanozyme as multifunctional amplifier," *Biosens. Bioelectron.*, 2020, doi: 10.1016/j.bios.2019.111875.
- [41] S. Oh *et al.*, "Magnetic Nanozyme-Linked Immunosorbent Assay for Ultrasensitive Influenza A Virus Detection," *ACS Appl. Mater. Interfaces*, 2018, doi: 10.1021/acsami.8b02735.
- [42] F. Liu *et al.*, "A Tumor-Microenvironment-Activated Nanozyme-Mediated Theranostic Nanoreactor for Imaging-Guided Combined Tumor Therapy," *Adv. Mater.*, 2019, doi: 10.1002/adma.201902885.
- [43] B. Xu *et al.*, "A Single-Atom Nanozyme for Wound Disinfection Applications," *Angew. Chemie - Int. Ed.*, 2019, doi: 10.1002/anie.201813994.
- [44] J. Xi *et al.*, "Light-enhanced sponge-like carbon nanozyme used for synergetic antibacterial therapy," *Biomater. Sci.*, 2019, doi: 10.1039/c9bm00705a.
- [45] T. Qin *et al.*, "Catalytic inactivation of influenza virus by iron oxide nanozyme," *Theranostics*, vol. 9, no. 23, pp. 6920–6935, 2019, doi: 10.7150/thno.35826.
- [46] N. Cheng, J. C. Li, D. Liu, Y. Lin, and D. Du, "Single-Atom Nanozyme Based on Nanoengineered Fe–N–C Catalyst with Superior Peroxidase-Like Activity for Ultrasensitive Bioassays," *Small*, 2019, doi: 10.1002/smll.201901485.

- [47] Y. Huang, Z. Liu, C. Liu, Y. Zhang, J. Ren, and X. Qu, "Selenium-Based Nanozyme as Biomimetic Antioxidant Machinery," *Chem. - A Eur. J.*, 2018, doi: 10.1002/chem.201801725.
- [48] H. Ding *et al.*, "Exosome-like Nanozyme Vesicles for H<sub>2</sub>O<sub>2</sub> - Responsive Catalytic Photoacoustic Imaging of Xenograft Nasopharyngeal Carcinoma," *Nano Lett.*, 2019, doi: 10.1021/acs.nanolett.8b03709.
- [49] Z. Li *et al.*, "Peroxidase-Mimicking Nanozyme with Enhanced Activity and High Stability Based on Metal-Support Interactions," *Chem. - A Eur. J.*, 2018, doi: 10.1002/chem.201703833.
- [50] H. Sun, Y. Zhou, J. Ren, and X. Qu, "Carbon Nanozymes: Enzymatic Properties, Catalytic Mechanism, and Applications," *Angewandte Chemie - International Edition*. 2018, doi: 10.1002/anie.201712469.
- [51] S. Shi *et al.*, "Iron oxide nanozyme suppresses intracellular Salmonella Enteritidis growth and alleviates infection in vivo," *Theranostics*, 2018, doi: 10.7150/thno.29303.
- [52] C. W. Lien *et al.*, "Visual detection of cyanide ions by membrane-based nanozyme assay," *Biosens. Bioelectron.*, 2018, doi: 10.1016/j.bios.2017.11.063.
- [53] T. Lin *et al.*, "A label-free fluorescence assay for hydrogen peroxide and glucose based on the bifunctional MIL-53(Fe) nanozyme," *Chem. Commun.*, 2018, doi: 10.1039/c7cc09819g.
- [54] K. Qiu, J. Wang, T. W. Rees, L. Ji, Q. Zhang, and H. Chao, "A mitochondria-targeting photothermogenic nanozyme for MRI-guided mild photothermal therapy," *Chem. Commun.*, 2018, doi: 10.1039/c8cc08570f.
- [55] L. Qin, X. Wang, Y. Liu, and H. Wei, "2D-Metal-Organic-Framework-Nanozyme Sensor Arrays for Probing Phosphates and Their Enzymatic Hydrolysis," *Anal. Chem.*, 2018, doi: 10.1021/acs.analchem.8b02428.
- [56] A. Mohamad, N. A. Keasberry, and M. U. Ahmed, "Enzyme-free gold-silver core-shell nanozyme immunosensor for the detection of haptoglobin," *Anal. Sci.*, 2018, doi: 10.2116/analsci.18P176.
- [57] P. B. O'Mara *et al.*, "Cascade Reactions in Nanozymes: Spatially Separated Active Sites inside Ag-Core-Porous-Cu-Shell Nanoparticles for Multistep Carbon Dioxide Reduction to Higher Organic Molecules," *J. Am. Chem. Soc.*, vol. 141, no. 36, pp. 14093–14097, 2019, doi: 10.1021/jacs.9b07310.
- [58] Y. He, X. Li, X. Xu, J. Pan, and X. Niu, "A cobalt-based polyoxometalate nanozyme with high peroxidase-mimicking activity at neutral pH for one-

- pot colorimetric analysis of glucose,” *J. Mater. Chem. B*, 2018, doi: 10.1039/c8tb01853g.
- [59] H. Zhang, X. Liang, L. Han, and F. Li, “‘Non-Naked’ Gold with Glucose Oxidase-Like Activity: A Nanozyme for Tandem Catalysis,” *Small*, 2018, doi: 10.1002/smll.201803256.
- [60] D. Li, B. Liu, P. J. J. Huang, Z. Zhang, and J. Liu, “Highly active fluorogenic oxidase-mimicking NiO nanozymes,” *Chem. Commun.*, 2018, doi: 10.1039/c8cc07062h.
- [61] Y. Sang, Y. Huang, W. Li, J. Ren, and X. Qu, “Bioinspired Design of Fe<sup>3+</sup>-Doped Mesoporous Carbon Nanospheres for Enhanced Nanozyme Activity,” *Chem. - A Eur. J.*, 2018, doi: 10.1002/chem.201801010.
- [62] N. Nandu, M. Salih Hizir, N. M. Roberston, B. Ozturk, and M. V. Yigit, “Masking the Peroxidase-Like Activity of the Molybdenum Disulfide Nanozyme Enables Label-Free Lipase Detection,” *ChemBioChem*, 2019, doi: 10.1002/cbic.201800471.
- [63] S. Bhattacharyya *et al.*, “Self-Assembled Pd<sub>12</sub>Coordination Cage as Photoregulated Oxidase-Like Nanozyme,” *J. Am. Chem. Soc.*, 2020, doi: 10.1021/jacs.0c09567.
- [64] K. Fan *et al.*, “In vivo guiding nitrogen-doped carbon nanozyme for tumor catalytic therapy,” *Nat. Commun.*, 2018, doi: 10.1038/s41467-018-03903-8.
- [65] J. Jiang, C. He, S. Wang, H. Jiang, J. Li, and L. Li, “Recyclable ferromagnetic chitosan nanozyme for decomposing phenol,” *Carbohydr. Polym.*, 2018, doi: 10.1016/j.carbpol.2018.06.068.
- [66] J. Han *et al.*, “Nanozyme-based lateral flow assay for the sensitive detection of Escherichia coli O157:H7 in milk,” *J. Dairy Sci.*, 2018, doi: 10.3168/jds.2018-14429.
- [67] S. S. Nadar and V. K. Rathod, “Magnetic-metal organic framework (magnetic-MOF): A novel platform for enzyme immobilization and nanozyme applications,” *International Journal of Biological Macromolecules*. 2018, doi: 10.1016/j.ijbiomac.2018.08.126.
- [68] F. Dashtestani, H. Ghourchian, and A. Najafi, “Albumin coated copper-cysteine nanozyme for reducing oxidative stress induced during sperm cryopreservation,” *Bioorg. Chem.*, 2018, doi: 10.1016/j.bioorg.2018.07.020.
- [69] S. Gao, H. Lin, H. Zhang, H. Yao, Y. Chen, and J. Shi, “Nanocatalytic Tumor Therapy by Biomimetic Dual Inorganic Nanozyme-Catalyzed

Cascade Reaction,” *Adv. Sci.*, vol. 6, no. 3, 2019, doi:  
10.1002/advs.201801733.

- [70] H. Qiu, F. Pu, X. Ran, C. Liu, J. Ren, and X. Qu, “Nanozyme as Artificial Receptor with Multiple Readouts for Pattern Recognition,” *Anal. Chem.*, vol. 90, no. 20, pp. 11775–11779, 2018, doi:  
10.1021/acs.analchem.8b03807.
