# Supplementary figures and images for: Nano-evolution and protein-based enzymatic evolution predicts novel types of natural product nanozymes of traditional Chinese medicine: cases of herbzymes of Taishan-Huangjing (Rhizoma polygonati) and Goji (Lycium chinense)
Source: Royal Society of Chemistry journal article supplement (doi:10.1039/d1na00475a), 2021-01-01

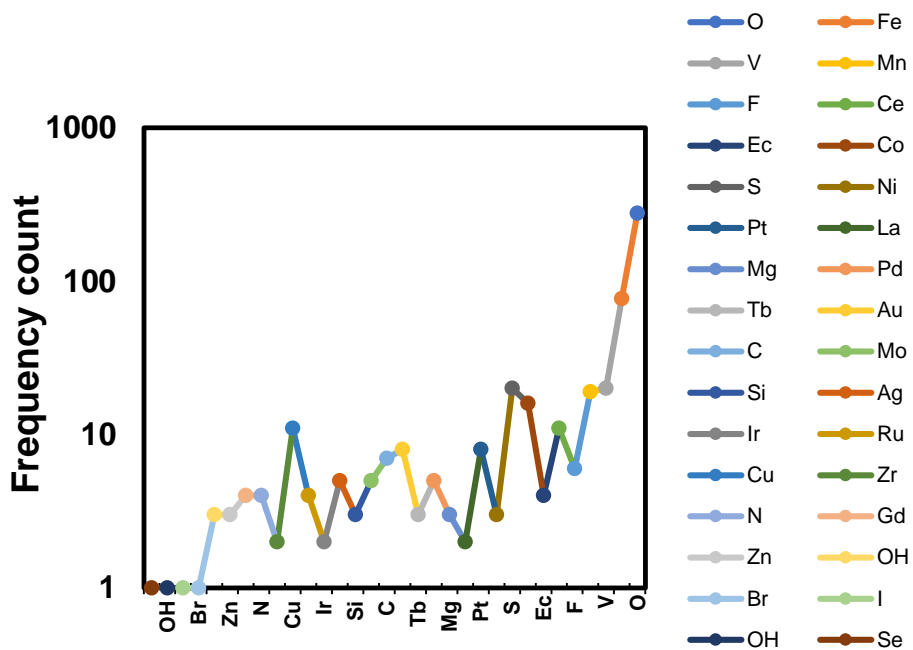

Supplementary Figure 1

Frequency diagram of nanozyme types based on element.

Supplement: d1na00475a2.pdf [file d1na00475a2.pdf]
